# Supplementary material for: The Synergy of Patterns vs. Processes at Community Level: A Key Linkage for Subtropical Native Forests along the Urban Riparian Zone
Source: MDPI journal article supplement (doi:10.3390/f13071041), 2022-07-01
Supplement: s1 [file s1]

# Supplementary Materials

In the table, spe\_no. is the numerical code of 78 vegetation species with different growth forms. In the column of life form, D refers to deciduous plants and E to evergreen plants. GF refers to the growth form with the value of 1, 2, and 3 for grass, shrub, and tree, respectively. The column of spe\_code contains the species code, where each plant species was initially assigned a code in the form of letter p (plant) and a unique number, followed by I, II, or III referring to the tree, shrub, or grass form of the species, when the species has more than one growth form. MRIV is the mean relative importance value of a plant species in the same layer amongst the three rivers, which was obtained by summing the MRIV of the species in the same layers by the three rivers and dividing by three. PB\_no. is the plant-bird assemblage group (PB) in which the species is located, and the grouping details are described in the results section. Bird population size is the population size classes of the 15 bird species of interest in this study for estimating plant-animal associations; the classification was based on the feeding habits of birds on the riparian vegetation species referring to the Ornithology of China (Zhao 2001), where 3 represents dominant species, 2 represents common species, 1 for rare species, and 0 for no bird distribution or no relevant records; b1-b15 are the bird species: *Zosterops japonica* Temminck & Schlegel (b1), *Pycnonotus sinensis* Gmelin (b2), *Parus major* Linnaeus (b3), *Aegithalos concinnus* Gould (b4), *Pycnonotus xanthorrhous* Anderson (b5), *Spizixos semitorques* Swinhoe (b6), *Hypsipetes mcclllandii* Horsfield (b7), *Streptopelia orientalis* Latham (b8), *Sturnus sericeus* Gmelin (b9), *Turdus merula* Linnaeus (b10), *Pica pica* Linnaeus (b11), *Garrulax sannio* Swinhoe (b12), *Streptopelia chinensis* Scopoli (b13) *Passer montanus* Linnaeus (b14), and *Urocissa erythrorhyncha* Boddaert (b15).

**Table S1.** The summary table of the basic information on the plant and bird species in the riparian rivers in Chongqing, China.

| Spe_no. | Species                                                                    | Life form | GF | Spe code | MRIV     | PB Group | Bird abundance |     |     |     |     |     |     |     |     |      |      |      |      |      |      |
|---------|----------------------------------------------------------------------------|-----------|----|----------|----------|----------|----------------|-----|-----|-----|-----|-----|-----|-----|-----|------|------|------|------|------|------|
|         |                                                                            |           |    |          |          |          | b 1            | b 2 | b 3 | b 4 | b 5 | b 6 | b 7 | b 8 | b 9 | b1 0 | b1 1 | b1 2 | b1 3 | b1 4 | b1 5 |
| 1       | <i>Eucalyptus robusta</i> Smith                                            | D         | 3  | p1       | 0.005346 | III      | 0              | 0   | 0   | 0   | 0   | 0   | 0   | 0   | 0   | 0    | 0    | 0    | 0    | 0    | 0    |
| 2       | <i>Buddleja asiatica</i> Lour.                                             | D         | 2  | p2       | 0.02431  | III      | 0              | 0   | 0   | 0   | 0   | 0   | 0   | 0   | 0   | 0    | 0    | 0    | 0    | 0    | 0    |
| 3       | <i>Rubus coreanus</i> Miq.                                                 | D         | 2  | p3       | 0.000853 | III      | 0              | 3   | 0   | 0   | 0   | 0   | 0   | 0   | 0   | 2    | 0    | 0    | 0    | 0    | 0    |
| 4       | <i>Erythrina variegata</i> L.                                              | D         | 3  | p5 I     | 0.155459 | IV       | 2              | 0   | 0   | 0   | 3   | 0   | 0   | 0   | 0   | 0    | 0    | 0    | 0    | 0    | 0    |
| 5       | <i>Erythrina variegata</i> L.                                              | D         | 2  | p5 II    | 0.038053 | IV       | 2              | 0   | 0   | 0   | 0   | 0   | 0   | 0   | 0   | 0    | 0    | 0    | 0    | 0    | 0    |
| 6       | <i>Ligustrum compactum</i> (Wall. ex G. Don) Hook. f. et Thoms. ex Brandis | E         | 3  | p7 I     | 0.008504 | III      | 0              | 3   | 0   | 0   | 0   | 0   | 0   | 0   | 0   | 2    | 0    | 0    | 0    | 0    | 0    |
| 7       | <i>Ligustrum compactum</i> (Wall. ex G. Don) Hook. f. et Thoms. ex Brandis | E         | 2  | p7 II    | 0.001557 | III      | 0              | 3   | 0   | 0   | 0   | 0   | 0   | 0   | 0   | 2    | 0    | 0    | 0    | 0    | 0    |
| 8       | <i>Cinnamomum camphora</i> (L.) Presl                                      | E         | 3  | p53      | 0.002896 | II       | 0              | 3   | 0   | 0   | 0   | 0   | 1   | 2   | 1   | 2    | 0    | 0    | 2    | 0    | 0    |
| 9       | <i>Buddleja lindleyana</i> Fort..                                          | D         | 2  | p6       | 0.018284 | III      | 0              | 0   | 0   | 0   | 0   | 0   | 0   | 0   | 0   | 0    | 0    | 0    | 0    | 0    | 0    |
| 10      | <i>Ficus tikoua</i> Bur.                                                   | D         | 1  | p8       | 0.199243 | III      | 0              | 0   | 0   | 0   | 0   | 0   | 0   | 0   | 0   | 0    | 0    | 0    | 0    | 0    | 0    |
| 11      | <i>Pterocarya stenoptera</i> C. DC.                                        | D         | 3  | p9 I     | 0.123152 | III      | 0              | 0   | 0   | 0   | 0   | 0   | 0   | 0   | 0   | 0    | 0    | 0    | 0    | 0    | 0    |
| 12      | <i>Pterocarya stenoptera</i> C. DC.                                        | D         | 2  | p9 II    | 0.031099 | III      | 0              | 0   | 0   | 0   | 0   | 0   | 0   | 0   | 0   | 0    | 0    | 0    | 0    | 0    | 0    |
| 13      | <i>Pterocarya stenoptera</i> C. DC.                                        | D         | 1  | p9 III   | 0.005419 | III      | 0              | 0   | 0   | 0   | 0   | 0   | 0   | 0   | 0   | 0    | 0    | 0    | 0    | 0    | 0    |
| 14      | <i>Quercus serrata</i> Murray                                              | D         | 3  | p10 I    | 0.002154 | III      | 0              | 0   | 0   | 0   | 0   | 0   | 0   | 0   | 0   | 0    | 0    | 0    | 0    | 0    | 0    |
| 15      | <i>Quercus serrata</i> Murray                                              | D         | 2  | p10 II   | 0.001335 | III      | 0              | 0   | 0   | 0   | 0   | 0   | 0   | 0   | 0   | 0    | 0    | 0    | 0    | 0    | 0    |
| 16      | <i>Koelreuteria bipinnata</i> Franch.                                      | D         | 3  | p11 I    | 0.034818 | III      | 0              | 0   | 0   | 0   | 0   | 0   | 0   | 0   | 0   | 0    | 0    | 0    | 0    | 0    | 0    |
| 17      | <i>Koelreuteria bipinnata</i> Franch.                                      | D         | 2  | p11 II   | 0.03383  | III      | 0              | 0   | 0   | 0   | 0   | 0   | 0   | 0   | 0   | 0    | 0    | 0    | 0    | 0    | 0    |
| 18      | <i>Citrus reticulata</i> Blanco                                            | E         | 3  | p12 I    | 0.009492 | III      | 0              | 0   | 0   | 0   | 0   | 0   | 0   | 0   | 0   | 0    | 0    | 0    | 0    | 0    | 0    |
| 19      | <i>Citrus reticulata</i> Blanco                                            | E         | 2  | p12 II   | 0.015799 | III      | 0              | 0   | 0   | 0   | 0   | 0   | 0   | 0   | 0   | 0    | 0    | 0    | 0    | 0    | 0    |
| 20      | <i>Broussonetia papyrifera</i> (Linnaeus) L'Heritier ex Ventenat           | D         | 3  | p14 I    | 0.158772 | I        | 2              | 3   | 0   | 0   | 0   | 0   | 0   | 0   | 0   | 0    | 2    | 0    | 0    | 0    | 3    |
| 21      | <i>Broussonetia papyrifera</i> (Linnaeus) L'Heritier ex Ventenat           | D         | 2  | p14 II   | 0.145852 | I        | 2              | 3   | 0   | 0   | 0   | 0   | 0   | 0   | 0   | 0    | 2    | 0    | 0    | 0    | 3    |
| 22      | <i>Broussonetia papyrifera</i> (Linnaeus) L'Heritier ex Ventenat           | D         | 1  | p14 III  | 0.182713 | III      | 0              | 0   | 0   | 0   | 0   | 0   | 0   | 0   | 0   | 0    | 0    | 0    | 0    | 0    | 0    |
| 23      | <i>Magnolia grandiflora</i> L.                                             | E         | 3  | p15      | 0.007123 | III      | 0              | 3   | 0   | 0   | 0   | 0   | 0   | 0   | 0   | 0    | 0    | 0    | 0    | 0    | 0    |
| 24      | <i>Osmanthus fragrans</i> (Thunb.) Loureiro                                | E         | 2  | p16      | 0.001426 | III      | 0              | 3   | 0   | 0   | 0   | 0   | 0   | 0   | 0   | 2    | 0    | 0    | 0    | 0    | 0    |
| 25      | <i>Campylotropis macrocarpa</i> (Bge.) Rehd                                | D         | 2  | p18      | 0.00764  | III      | 0              | 0   | 0   | 0   | 0   | 0   | 0   | 0   | 0   | 0    | 0    | 0    | 0    | 0    | 0    |
| 26      | <i>Ficus virens</i> Aiton                                                  | D         | 3  | p19 I    | 0.021217 | I        | 2              | 3   | 0   | 0   | 3   | 0   | 1   | 0   | 1   | 2    | 2    | 0    | 0    | 0    | 0    |
| 27      | <i>Ficus virens</i> Aiton                                                  | D         | 2  | p19 II   | 0.104672 | I        | 2              | 3   | 0   | 0   | 3   | 0   | 1   | 0   | 1   | 2    | 2    | 0    | 0    | 0    | 0    |

|    |                                                |   |   |         |          |     |   |   |   |   |   |   |   |   |   |   |   |   |   |   |
|----|------------------------------------------------|---|---|---------|----------|-----|---|---|---|---|---|---|---|---|---|---|---|---|---|---|
| 28 | <i>Vitex negundo</i> L.                        | D | 2 | p20     | 0.010281 | IV  | 0 | 0 | 0 | 0 | 3 | 0 | 0 | 0 | 0 | 0 | 0 | 0 | 0 | 0 |
| 29 | <i>Pyracantha fortuneana</i> (Maxim.) Li       | E | 2 | p21     | 0.014877 | III | 0 | 3 | 0 | 0 | 0 | 0 | 0 | 0 | 0 | 2 | 2 | 0 | 0 | 0 |
| 30 | <i>Viburnum dilatatum</i> Thunb.               | D | 3 | p22 I   | 0.01266  | III | 2 | 3 | 0 | 0 | 0 | 3 | 0 | 0 | 0 | 2 | 0 | 0 | 0 | 0 |
| 31 | <i>Viburnum dilatatum</i> Thunb.               | D | 2 | p22 II  | 0.003947 | III | 2 | 3 | 0 | 0 | 0 | 3 | 0 | 0 | 0 | 2 | 0 | 0 | 0 | 0 |
| 32 | <i>Prunus salicina</i> Lindl.                  | D | 3 | p23 I   | 0.025145 | III | 0 | 0 | 0 | 0 | 0 | 0 | 0 | 0 | 0 | 0 | 0 | 0 | 0 | 0 |
| 33 | <i>Prunus salicina</i> Lindl.                  | D | 2 | p23 II  | 0.005375 | III | 0 | 0 | 0 | 0 | 0 | 0 | 0 | 0 | 0 | 0 | 0 | 0 | 0 | 0 |
| 34 | <i>Litchi chinensis</i> Sonn.                  | E | 3 | p24     | 0.018156 | III | 0 | 0 | 0 | 0 | 0 | 0 | 0 | 0 | 0 | 0 | 0 | 0 | 0 | 0 |
| 35 | <i>Melia azedarach</i> L.                      | D | 3 | p25 I   | 0.001711 | III | 0 | 3 | 0 | 0 | 0 | 0 | 0 | 0 | 0 | 0 | 0 | 0 | 0 | 0 |
| 36 | <i>Melia azedarach</i> L.                      | D | 2 | p25 II  | 0.04218  | III | 0 | 3 | 0 | 0 | 0 | 0 | 0 | 0 | 0 | 0 | 0 | 0 | 0 | 0 |
| 37 | <i>Salix babylonica</i> L.                     | D | 3 | p17     | 0.001823 | III | 0 | 3 | 0 | 0 | 0 | 0 | 0 | 0 | 0 | 0 | 0 | 0 | 0 | 0 |
| 38 | <i>Coriaria nepalensis</i> Wall.               | D | 2 | p26     | 0.004141 | III | 0 | 3 | 0 | 0 | 3 | 3 | 0 | 0 | 0 | 0 | 0 | 0 | 0 | 0 |
| 39 | <i>Mallotus barbatus</i> (Wall.) Muell. Arg.   | D | 3 | p27     | 0.010458 | III | 0 | 0 | 0 | 0 | 0 | 0 | 0 | 0 | 0 | 0 | 0 | 0 | 0 | 0 |
| 40 | <i>Litsea mollis</i> Hemsl.                    | D | 3 | p28     | 0.001514 | III | 0 | 0 | 0 | 0 | 0 | 0 | 0 | 0 | 0 | 0 | 0 | 0 | 0 | 0 |
| 41 | <i>Salix rosthornii</i> Seemen                 | D | 3 | p29 I   | 0.003584 | III | 0 | 3 | 0 | 0 | 0 | 0 | 0 | 0 | 0 | 0 | 0 | 0 | 0 | 0 |
| 42 | <i>Salix rosthornii</i> Seemen                 | D | 2 | p29 II  | 0.011044 | III | 0 | 3 | 0 | 0 | 0 | 0 | 0 | 0 | 0 | 0 | 0 | 0 | 0 | 0 |
| 43 | <i>Salix rosthornii</i> Seemen                 | D | 1 | p29 III | 0.010754 | III | 0 | 0 | 0 | 0 | 0 | 0 | 0 | 0 | 0 | 0 | 0 | 0 | 0 | 0 |
| 44 | <i>Ligustrum lucidum</i> Ait.                  | D | 2 | p30     | 0.004575 | IV  | 0 | 3 | 0 | 0 | 0 | 0 | 0 | 0 | 0 | 0 | 2 | 0 | 0 | 0 |
| 45 | <i>Meliosma cuneifolia</i> Franch.             | D | 3 | p31     | 0.011867 | III | 0 | 0 | 0 | 0 | 0 | 0 | 0 | 0 | 0 | 0 | 0 | 0 | 0 | 0 |
| 46 | <i>Eriobotrya japonica</i> (Thunb.) Lindl.     | E | 3 | p32 I   | 0.008792 | IV  | 0 | 3 | 0 | 0 | 3 | 0 | 0 | 0 | 0 | 0 | 0 | 0 | 0 | 0 |
| 47 | <i>Eriobotrya japonica</i> (Thunb.) Lindl.     | E | 2 | p32 II  | 0.006915 | III | 0 | 0 | 0 | 0 | 0 | 0 | 0 | 0 | 0 | 0 | 0 | 0 | 0 | 0 |
| 48 | <i>Celtis sinensis</i> Pers.                   | D | 3 | p33 I   | 0.011009 | IV  | 2 | 0 | 0 | 0 | 0 | 0 | 0 | 0 | 0 | 0 | 0 | 0 | 0 | 0 |
| 49 | <i>Celtis sinensis</i> Pers.                   | D | 2 | p33 II  | 0.001394 | IV  | 2 | 0 | 0 | 0 | 0 | 0 | 0 | 0 | 0 | 0 | 0 | 0 | 0 | 0 |
| 50 | <i>Bischofia javanica</i> Blume                | E | 3 | p34     | 0.014993 | IV  | 0 | 0 | 0 | 0 | 3 | 0 | 0 | 0 | 0 | 0 | 0 | 0 | 0 | 0 |
| 51 | <i>Salix variegata</i> Franch.                 | D | 2 | p35 I   | 0.084511 | III | 0 | 3 | 0 | 0 | 0 | 0 | 0 | 0 | 0 | 0 | 0 | 0 | 0 | 0 |
| 52 | <i>Salix variegata</i> Franch.                 | D | 1 | p35 II  | 0.020804 | III | 0 | 3 | 0 | 0 | 0 | 0 | 0 | 0 | 0 | 0 | 0 | 0 | 0 | 0 |
| 53 | <i>Morus alba</i> L.                           | D | 3 | p37 I   | 0.080261 | I   | 0 | 3 | 0 | 0 | 0 | 0 | 0 | 0 | 1 | 0 | 2 | 0 | 0 | 1 |
| 54 | <i>Morus alba</i> L.                           | D | 2 | p37 II  | 0.215155 | I   | 0 | 3 | 0 | 0 | 0 | 0 | 0 | 0 | 1 | 0 | 2 | 0 | 0 | 1 |
| 55 | <i>Morus alba</i> L.                           | D | 1 | p37III  | 0.166667 | III | 0 | 0 | 0 | 0 | 0 | 0 | 0 | 0 | 0 | 0 | 0 | 0 | 0 | 0 |
| 56 | <i>Senna bicapsularis</i> (L.) Roxb.           | D | 2 | p38     | 0.000853 | III | 0 | 0 | 0 | 0 | 0 | 0 | 0 | 0 | 0 | 0 | 0 | 0 | 0 | 0 |
| 57 | <i>Debregeasia longifolia</i> (Burm. F.) Wedd. | D | 2 | p39     | 0.053985 | IV  | 2 | 0 | 0 | 0 | 0 | 0 | 0 | 0 | 0 | 0 | 2 | 0 | 0 | 0 |
| 58 | <i>Amygdalus persica</i> L.                    | D | 3 | p40     | 0.006809 | III | 0 | 0 | 0 | 0 | 0 | 0 | 0 | 0 | 0 | 0 | 0 | 0 | 0 | 0 |
| 59 | <i>Cinnamomum japonicum</i> Sieb.              | E | 3 | p41 I   | 0.02312  | II  | 0 | 3 | 0 | 0 | 0 | 0 | 1 | 0 | 1 | 2 | 0 | 0 | 2 | 0 |
| 60 | <i>Cinnamomum japonicum</i> Sieb.              | E | 2 | p41 II  | 0.035177 | II  | 0 | 3 | 0 | 0 | 0 | 0 | 1 | 0 | 1 | 2 | 0 | 0 | 2 | 0 |
| 61 | <i>Tetrapanax papyrifer</i> (Hook.) K. Koch    | D | 2 | p42     | 0.011192 | III | 0 | 0 | 0 | 0 | 0 | 0 | 0 | 0 | 0 | 0 | 0 | 0 | 0 | 0 |
| 62 | <i>Sapium sebiferum</i> (L.) Roxb.             | D | 3 | p43 I   | 0.006997 | II  | 2 | 3 | 3 | 0 | 3 | 0 | 0 | 2 | 0 | 0 | 0 | 0 | 2 | 0 |
| 63 | <i>Sapium sebiferum</i> (L.) Roxb.             | D | 2 | p43 II  | 0.009926 | III | 2 | 3 | 0 | 0 | 0 | 0 | 0 | 2 | 0 | 0 | 0 | 0 | 2 | 0 |
| 64 | <i>Sapium sebiferum</i> (L.) Roxb.             | D | 1 | p43III  | 0.011469 | III | 0 | 0 | 0 | 0 | 0 | 0 | 0 | 0 | 0 | 0 | 0 | 0 | 0 | 0 |

[illegible]

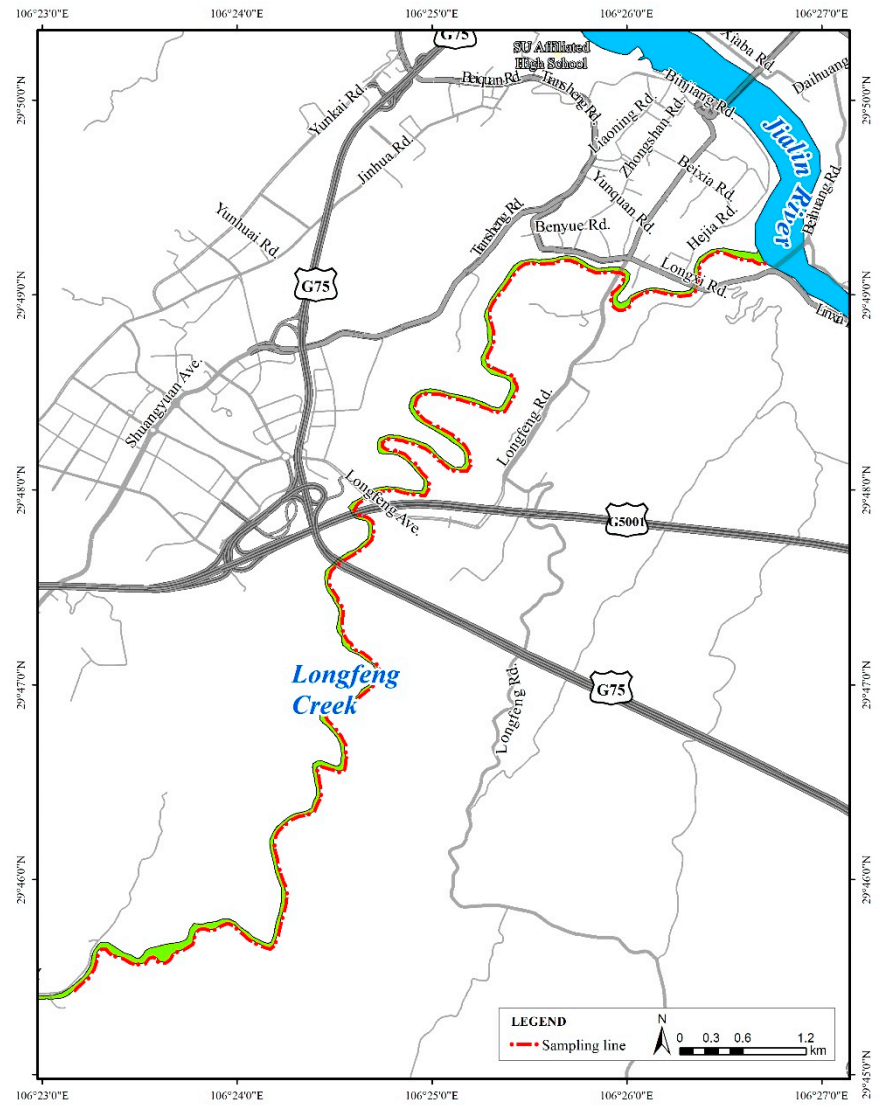

**Figure S1.** Bird sampling line in Kuxi and Yuxi Rivers.
